# Supplementary material
Source: publisher figshare collection journal article supplement (https://acs.figshare.com/ndownloader/files/9445894)
Supplement: Supplementary file 1 [file 9445894]

Supporting Information

**Surfactant-Free Vapor-Phase Synthesis of  
Single-crystalline Gold Nanoplates for  
Optimally Bioactive Surfaces**

*Youngdong Yoo,<sup>†,&‡</sup> Hyoban Lee,<sup>†,‡</sup> Hyunsoo Lee,<sup>||,§</sup> Miyeon Lee,<sup>†</sup> Siyeong Yang,<sup>†</sup>  
Ahreum Hwang,<sup>†,#</sup> Si-in Kim,<sup>†</sup> Jeong Young Park,<sup>||,§</sup> Jaebum Choo,<sup>+</sup> Taejoon Kang,<sup>\*,#,||,Δ</sup>  
and Bongsoo Kim<sup>\*†</sup>*

*<sup>†</sup>Department of Chemistry, KAIST, Daejeon 34141, Korea*

*<sup>&</sup>Department of Chemistry, University of Minnesota, Minneapolis MN 55455, USA*

*<sup>||</sup>Center for Nanomaterials and Chemical Reactions, IBS, Daejeon 34141, Korea*

*<sup>§</sup>Graduate School of EEWS, KAIST, Daejeon 34141, Korea*

*<sup>#</sup>Hazards Monitoring Bionano Research Center, KRIBB, Daejeon 34141, Korea*

*<sup>+</sup>Department of Bionano Engineering, Hanyang University, Ansan 15588, Korea*

*<sup>¶</sup>BioNano Health Guard Research Center, KRIBB, Daejeon 34141, Korea*

*<sup>Δ</sup>Department of Nanobiotechnology, KRIBB School of Biotechnology, UST, Daejeon  
34113, Korea*

*\*To whom correspondence should be addressed.*

E-mail: bongsoo@kaist.ac.kr (B.K.)

E-mail: kangtaejoon@kribb.re.kr (T.K.)

*<sup>‡</sup>These authors contributed equally to this work.*

## 1. Thin and small Au nanoplates grown on *r*-cut sapphire substrate

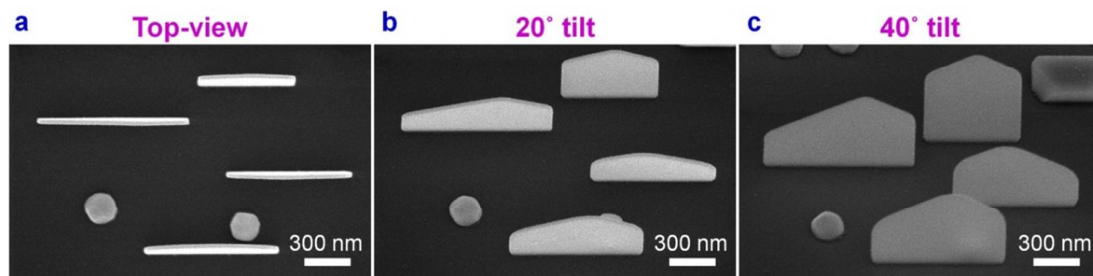

**Figure S1.** (a) Top-view, (b) 20° tilted-view, and (c) 40° tilted-view SEM images of small Au nanoplates grown on *r*-cut sapphire substrates.

## 2. Magnified AFM topographic image of Au nanoplate

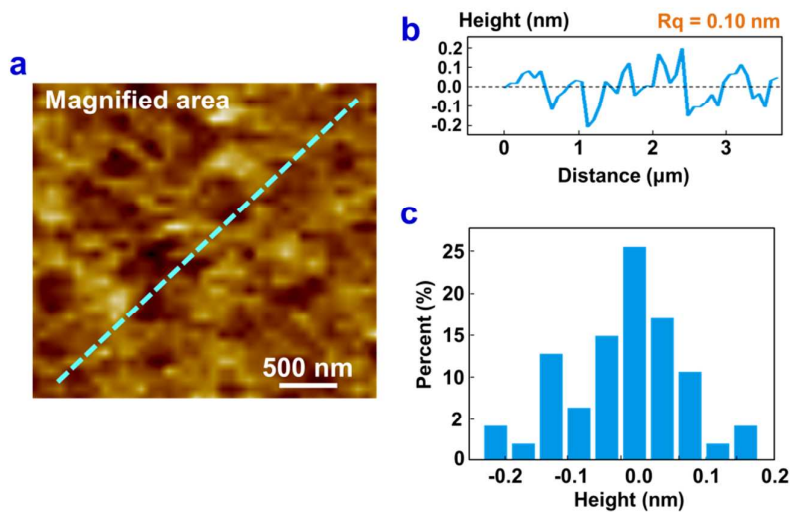

**Figure S2.** (a) Magnified AFM topographic image of Au nanoplate in Figure 2a. The scale is  $3\ \mu\text{m} \times 3\ \mu\text{m}$ . (b) Sectional view along a dotted cyan line in (a). The surface-height variation is between -0.2 nm and 0.2 nm with 0.10 nm of  $R_q$ . (c) Surface height distribution of (b).

### 3. Epitaxial relationship at the interface between Au seed NP and *m*-cut sapphire substrate

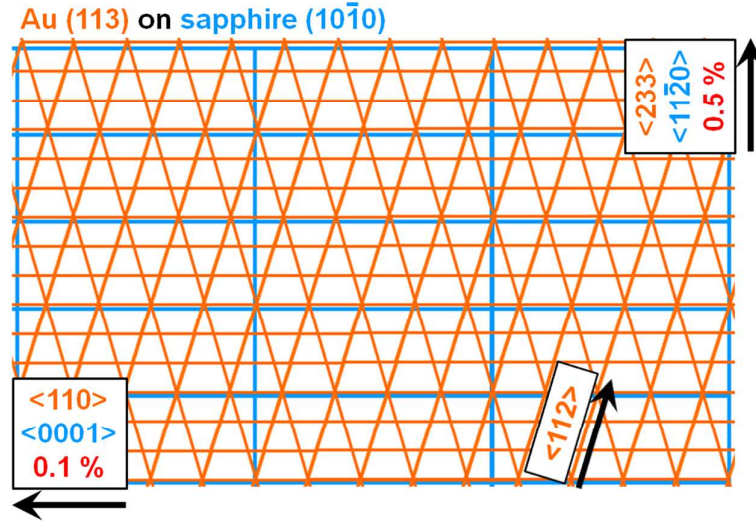

**Figure S3.** Schematic illustration of atomic planes at the epitaxial interface between Au (113) and sapphire (10 $\bar{1}$ 0) planes. 9 layers of Au and 2 layers of sapphire have 0.1% domain-matched misfit along Au  $\langle 110 \rangle$ //sapphire  $\langle 0001 \rangle$  direction. The lattice spacing of the Au (110) plane is 1.44 Å and that of the sapphire (0001) plane is 6.49 Å.

#### 4. Selective synthesis of Au nanostructures by deposition flux

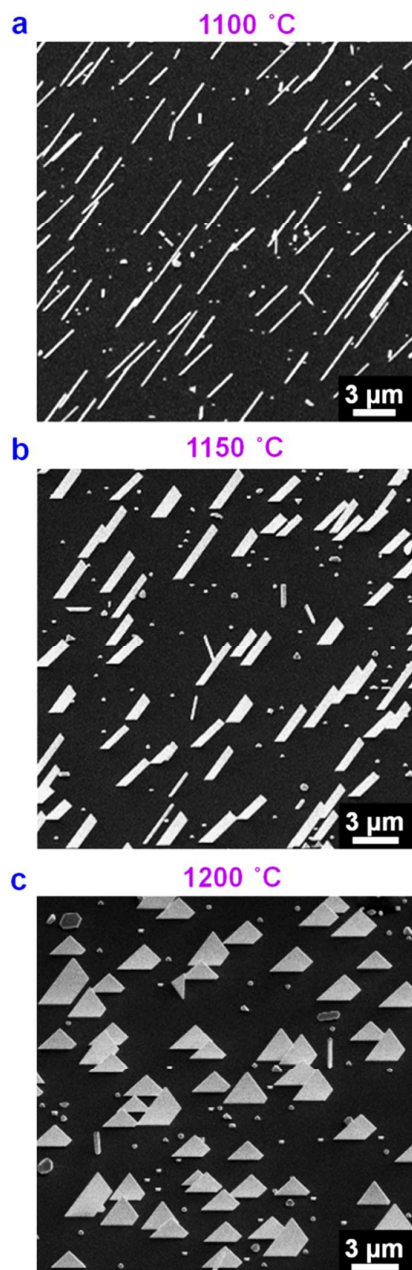

**Figure S4.** 45° tilted-view SEM images of (a) Au NWs, (b) nanobelts, and (c) nanoplates grown at a precursor temperature of 1100 °C, 1150 °C, 1200 °C, respectively. The temperature of *m*-cut sapphire substrates were maintained at 1000 °C for all experiments.

## 5. Synthesis of horizontal Au NWs in very high deposition flux condition

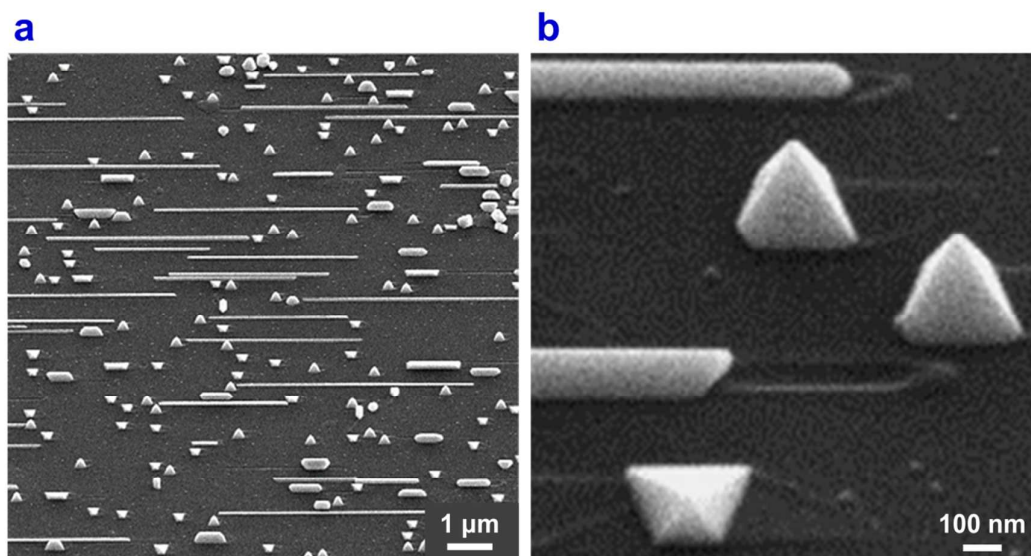

**Figure S5.** (a) Top-view and (b) Magnified and 45° tilted-view SEM images of horizontal Au NWs on *m*-cut sapphire substrate. Au power was used as a precursor instead of Au lump to increase the deposition flux of Au atoms. The precursor temperature was 1200 °C.

## 6. Au NPs on a nanoplate structure through the biotin-avidin interaction

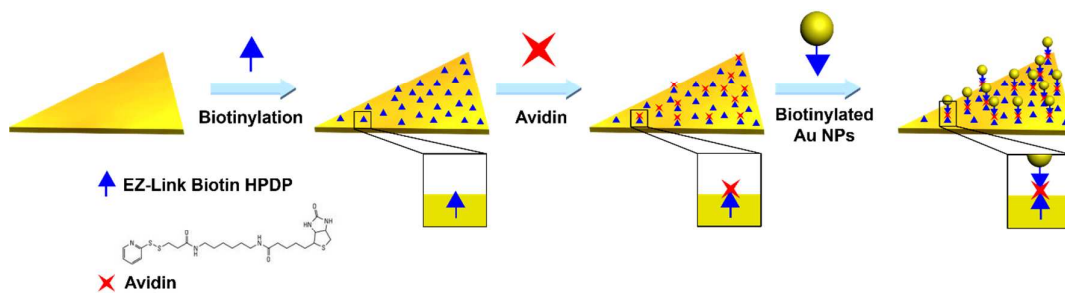

**Figure S6.** Schematic illustration of the construction process of Au NPs on a nanoplate structure through the biotin-avidin interaction.

## 7. Full SERS spectra corresponding Figure 6f

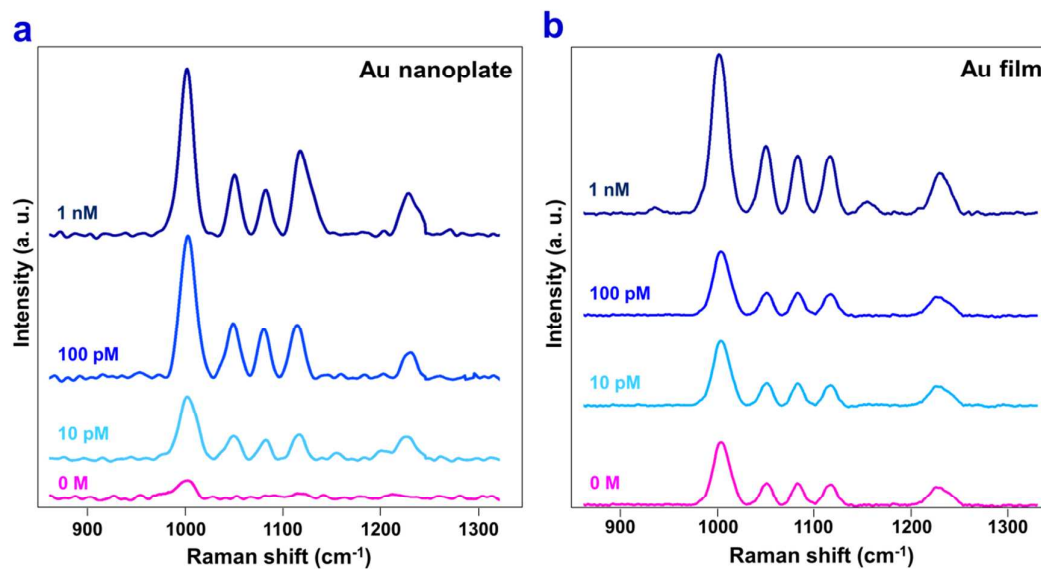

**Figure S7.** SERS spectra obtained from (a) Au NPs on a nanoplate structures and (b) Au NPs on a film structures with various avidin concentrations (0 M, 10 pM, 100 pM, and 1 nM). The ultraflat Au nanoplate-based SERS sensor has a detection limit of 10 pM, whereas the rough Au film-based SERS sensor has a detection limit of 1 nM.



## 8. SEM images of Au NPs on Au nanoplate and Au film

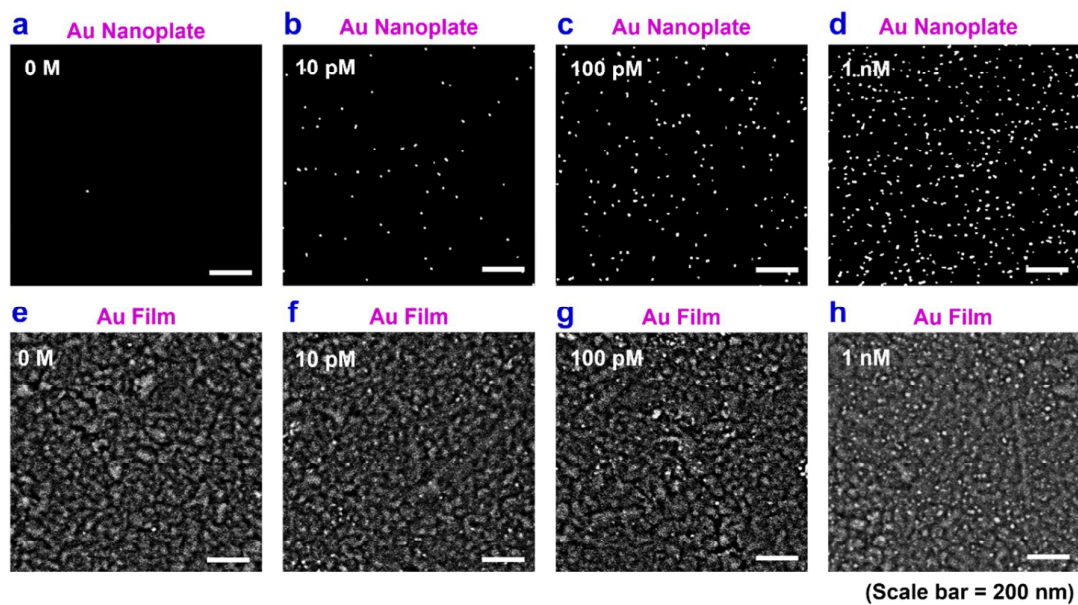

**Figure S8.** SEM images of Au NPs attached on (a-d) Au nanoplate and (e-h) Au film at various concentrations of avidin (0 M, 10 pM, 100 pM, 1 nM).
